# Supplementary material
Source: publisher figshare collection journal article supplement (https://sage.figshare.com/ndownloader/files/14005331)
Supplement: Supplementary file 1 [file 14005331]

## Sheet: Fields
Field num	Field	Field Name	Field Description	Component	Component Description	Data Source	Min. size (characters)	Max. size (characters)	Blank/Empty Count (National)	Total Count (National)	Distinct values	Mean	Std. Dev	Min. Value	Max. Value	Digits total	Decimal precision	SQL type	Release date
1	voterbase_id	Voterbase ID	Unique identifier for VoterBase records	VoterBase	TargetSmart's national voter file	TargetSmart	4	23	0	258049539								VARCHAR(23)	20170505
2	vb.voterbase_id	Voterbase ID	Unique identifier for VoterBase records	VoterBase	TargetSmart's national voter file	TargetSmart	4	23	0	258049539								VARCHAR(23)	20170505
3	vb.smartid	TargetSmart ID	Unique national identifier (ID)	VoterBase	TargetSmart's national voter file	TargetSmart	0	0	258049539	258049539	1							VARCHAR(1)	20170505
4	vb.voterbase_household_id	VoterBase Household ID	Unique household ID for VoterBase	VoterBase	TargetSmart's national voter file	TargetSmart	16	48	0	258049539								VARCHAR(48)	20170505
5	vb.smartvan_id	SmartVAN ID	Unique individual ID for SmartVAN	VoterBase	TargetSmart's national voter file	SmartVAN	0	8	21873223	258049539		7.62693e+06	8.45905e+06	1.0	4.8312067E7	8	0	INT	20170505
6	vb.votebuilder_id	Votebuilder ID	Unique individual ID for Votebuilder	VoterBase	TargetSmart's national voter file	Votebuilder	0	8	54068030	258049539		7.94431e+06	8.83916e+06	1.0	4.1026677E7	8	0	INT	20170505
7	vb.dncrunid	DNC Run ID	Internal unique ID specific to each state voter file build	VoterBase	TargetSmart's national voter file	TargetSmart	0	16	54037195	258049539								VARCHAR(16)	20170505
8	vb.dnc_personid	DNC Person ID	Internal unique individual ID	VoterBase	TargetSmart's national voter file	TargetSmart	0	9	54037195	258049539		2.22851e+08	1.05804e+08	1.0	3.80709719E8	9	0	INT	20170505
9	vb.county_id	County Registration ID	County level voter registration ID. Some counties in some states keep a voter registration ID. Where TargetSmart has access to these county level IDs, this field will contain them.	VoterBase	TargetSmart's national voter file	voterbase	0	12	193590402	258049539								VARCHAR(12)	20170505
10	vb.voterid	Source Voter File ID	Government identifier from the source voter file, unprocessed	VoterBase	TargetSmart's national voter file	State Voter File	0	38	57296392	258049539								VARCHAR(38)	20170505
11	vb.tsmart_exact_track	ExactTrack Person ID	ExactTrack Person ID	VoterBase	TargetSmart's national voter file	TargetSmart	15	20	0	258049539								VARCHAR(20)	20170505
12	vb.tsmart_exact_address_track	ExactTrack Address ID	ExactTrack Address ID	VoterBase	TargetSmart's national voter file	TargetSmart	16	16	0	258049539								VARCHAR(16)	20170505
13	vb.vf_clink	Consumer Link	AbiliTec Consumer Link	VoterBase	TargetSmart's national voter file	Commercial	13	13	0	258049539		2.59738e+12	2.24333e+11	2.540200000006E12	3.559999998941E12	13	0	INT	20170505
14	vb.vf_alink	Address Link	AbiliTec Address Link	VoterBase	TargetSmart's national voter file	Commercial	0	13	71	258049539		2.54631e+12	1.26302e+11	2.530000000002E12	3.539999997917E12	13	0	INT	20170505
15	vb.tsmart_name_addr_digest	TargetSmart Name Address Match Key	Unique individual ID created by combining Name and TargetSmart Address fields	VoterBase	TargetSmart's national voter file	TargetSmart	16	16	0	258049539								VARCHAR(16)	20170505
16	vb.reg_name_addr_digest	Registration Name Address Match Key	Unique individual ID created by combining Name and Registration Address fields	VoterBase	TargetSmart's national voter file	TargetSmart	0	16	54037195	258049539								VARCHAR(16)	20170505
17	vb.tsmart_address_digest	TargetSmart Address Match Key	Unique address ID created by combining the TargetSmart Address fields	VoterBase	TargetSmart's national voter file	TargetSmart	0	16	95423	258049539								VARCHAR(16)	20170505
18	vb.reg_address_digest	Registration Address Match Key	Unique address ID created by combining the Registration Address fields	VoterBase	TargetSmart's national voter file	TargetSmart	0	16	54132331	258049539								VARCHAR(16)	20170505
19	vb.mail_address_digest	Mail Address Match Key	Unique address ID created by combining the Mailing Address fields	VoterBase	TargetSmart's national voter file	TargetSmart	0	16	243356954	258049539								VARCHAR(16)	20170505
20	vb.etm_match_key	E-Tech Match Key	E-Tech Match Key	VoterBase	TargetSmart's national voter file		0	6	3010482	258049539								VARCHAR(6)	20170505
21	vb.firsttimeseen_voterid	First Time Seen	Date/Time stamp for first time this voterID has been seen by TargetSmart	VoterBase	TargetSmart's national voter file		0	8	220054466	258049539		2.01567e+07	10698.6	2.0121015E7	2.0170412E7	8	0	INT	20170505
22	vb.vf_voterfile_update_date	Voter File Update Date	Date file is received from the state	VoterBase	TargetSmart's national voter file	State Voter File	8	8	0	258049539	41	2.01696e+07	2328.65	2.0160211E7	2.0170412E7	8	0	INT	20170505
23	vb.tsmart_version_number	TargetSmart Build Version Number	TargetSmart voter file build version number for the most recently released file, ie.- FL1203, CA1303, MN1402, etc.	VoterBase	TargetSmart's national voter file	TargetSmart	6	6	0	258049539	51							VARCHAR(6)	20170505
24	vb.processed_date	Date Processed	Date state voter file was processed by TargetSmart	VoterBase	TargetSmart's national voter file	TargetSmart	8	8	0	258049539	29	2.017e+07	1839.28	2.0160302E7	2.0170421E7	8	0	INT	20170505
25	vb.tsmart_first_name	Voter First Name	Parsed First Name	VoterBase	TargetSmart's national voter file	State Voter File	0	25	3063	258049539								VARCHAR(25)	20170505
26	vb.tsmart_middle_name	Voter Middle Name	Parsed Middle Name	VoterBase	TargetSmart's national voter file	State Voter File	0	25	52176570	258049539								VARCHAR(25)	20170505
27	vb.tsmart_last_name	Voter Last Name	Parsed Last Name	VoterBase	TargetSmart's national voter file	State Voter File	0	30	14	258049539								VARCHAR(30)	20170505
28	vb.tsmart_name_suffix	Voter Name Suffix	Parsed Name Suffix (Jr, Sr, I, II, III, etc.)	VoterBase	TargetSmart's national voter file	State Voter File	0	3	249244346	258049539	11							VARCHAR(3)	20170505
29	vb.tsmart_full_address	TargetSmart Address	TargetSmart cleaned, updated full address line	VoterBase	TargetSmart's national voter file	TargetSmart	0	60	95423	258049539								VARCHAR(60)	20170505
30	vb.tsmart_city	TargetSmart City	TargetSmart cleaned, updated city	VoterBase	TargetSmart's national voter file	TargetSmart	0	30	130152	258049539								VARCHAR(30)	20170505
31	vb.tsmart_state	TargetSmart State	TargetSmart cleaned, updated state	VoterBase	TargetSmart's national voter file	TargetSmart	0	2	9877	258049539	64							VARCHAR(2)	20170505
32	vb.tsmart_zip	TargetSmart Zip Code	Cleaned, updated Registration Address Zip Code	VoterBase	TargetSmart's national voter file	TargetSmart	5	5	0	258049539								VARCHAR(5)	20170505
33	vb.tsmart_zip4	TargetSmart Zip Code+4	Cleaned, updated Registration Address Zip Code 4-digit extension	VoterBase	TargetSmart's national voter file	TargetSmart	0	4	6220732	258049539								VARCHAR(4)	20170505
34	vb.tsmart_street_number	TargetSmart Address - Street Number	Parsed street/house number of updated address	VoterBase	TargetSmart's national voter file	TargetSmart	0	15	429858	258049539								VARCHAR(15)	20170505
35	vb.tsmart_pre_directional	TargetSmart Address - Pre Directional	Parsed pre-direction indicator of updated address	VoterBase	TargetSmart's national voter file	TargetSmart	0	2	204216851	258049539	10							VARCHAR(2)	20170505
36	vb.tsmart_street_name	TargetSmart Address - Street Name	Parsed street name of updated address	VoterBase	TargetSmart's national voter file	TargetSmart	0	50	96414	258049539								VARCHAR(50)	20170505
37	vb.tsmart_street_suffix	TargetSmart Address - Street Suffix	Parsed street type/suffix of updated address (DR, AVE, RD, etc.)	VoterBase	TargetSmart's national voter file	TargetSmart	0	5	15310599	258049539								VARCHAR(5)	20170505
38	vb.tsmart_post_directional	TargetSmart Address - Post Directional	Parsed post-direction indicator of updated address	VoterBase	TargetSmart's national voter file	TargetSmart	0	2	242621241	258049539	13							VARCHAR(2)	20170505
39	vb.tsmart_unit_designator	TargetSmart Address - Unit Designator	Parsed unit designator of updated address (Apt, Unit, Ste, etc.)	VoterBase	TargetSmart's national voter file	TargetSmart	0	9	216766158	258049539								VARCHAR(9)	20170505
40	vb.tsmart_secondary_number	TargetSmart Address - Unit Number	Parsed unit number of updated address	VoterBase	TargetSmart's national voter file	TargetSmart	0	14	216311453	258049539								VARCHAR(14)	20170505
41	vb.tsmart_effective_date	TargetSmart Effective Date	Last verified occupancy date	VoterBase	TargetSmart's national voter file	TargetSmart	0	6	117933865	258049539		200647	822.232	610.0	201704.0	6	0	INT	20170505
42	vb.tsmart_address_usps_address_code	TargetSmart Address - USPS Code	Type of building derived from various USPS codes	VoterBase	TargetSmart's national voter file	USPS Processing	0	1	7218633	258049539	9							VARCHAR(1)	20170505
43	vb.tsmart_address_carrier_route	TargetSmart Address - USPS Carrier Route	A code that corresponds to households served by an individual mail carrier within a 5-digit U.S. zip-code	VoterBase	TargetSmart's national voter file	USPS Processing	0	4	7167719	258049539								VARCHAR(4)	20170505
44	vb.tsmart_address_dpv_confirm_code	TargetSmart Address - DPV Confirmation Indicator	Delivery Point Validation (DPV) Confirmation Indicator is the primary method used by the USPS to determine whether an address was considered deliverable or undeliverable	VoterBase	TargetSmart's national voter file	USPS Processing	0	1	14543116	258049539	5							VARCHAR(1)	20170505
45	vb.tsmart_address_dpv_footnote	TargetSmart Address - DPV Footnotes	Footnotes Reporting CASS Zip+4 Certification, DPV Validation Observations, and CMRA Observations	VoterBase	TargetSmart's national voter file	USPS Processing	0	6	927222	258049539	20							VARCHAR(6)	20170505
46	vb.tsmart_move_type	TargetSmart Address - Move Type	NCOA-sourced flag indicating move type for Individual, Family and Business.	VoterBase	TargetSmart's national voter file	USPS Processing	0	1	238030422	258049539	4							VARCHAR(1)	20170505
47	vb.tsmart_ncoa_return_code	TargetSmart Address - NCOA Return Code	NCOA Codes indicating information about the NCOA match.	VoterBase	TargetSmart's national voter file	USPS Processing	0	2	226987097	258049539	34							VARCHAR(2)	20170505
